1 Is Overfishing the Main or Only Factor in Fishery  
2 Resource Decline? The Case of The Magdalena  
3 River Fishery and Its Correlation with Anthropic  
4 Pressures

5

6 Fisheries Decline: Overfishing or Anthropic  
7 Pressures?

8

9 Sandra Hernández-Barrero <sup>1\*</sup>, Mauricio Valderrama Barco <sup>2¶</sup>, Carlos Guillermo Barreto  
10 Reyes <sup>3¶</sup>, Luis Sierra Sierra <sup>4¶</sup>, Wolfgang Stotz <sup>5¶</sup>

11

12 <sup>a</sup> Fundación Humedales, Bogotá, Colombia

13 <sup>b</sup> Fundación Humedales, Bogotá, Colombia

14 <sup>c</sup> Autoridad Nacional de Pesca y Acuicultura, Bogotá, Colombia

15 <sup>d</sup> Universidad Nacional de Costa Rica, Heredia, Costa Rica

16 <sup>e</sup> Universidad Católica del Norte, Coquimbo, Chile

17

18 \* Corresponding author:

19 E-mail: [sandrahe@fundacionhumedales.org](mailto:sandrahe@fundacionhumedales.org)

20

21 ¶These authors contributed equally to this work.

22

## 23 **Abstract**

24           Overfishing has been historically considered as the main cause of fish stock  
25 depletion worldwide. This paradigm has oriented fishery management towards a  
26 classical approach, under which externalities to fisheries were not considered as they  
27 were difficult to assess and measure. The aim of this study is to describe the dynamics  
28 of different environmental, economic, and demographic variables (water flow, forest  
29 cover, gold production, population growth, stored water volume, and sediments) in  
30 relation to the behavior of the fishery production in the Magdalena-Cauca river basin  
31 from 1980 to 2015. Generalized Additive Models were used to determine the variables  
32 that best explain fishery production. The findings confirmed that environmental  
33 deterioration of the Magdalena River basin explained at least 60% of the reduction in  
34 fishery production. Thus, we concluded that the traditional approach of making fishers  
35 responsible for the decline of fish production was a misguided argument, and before  
36 implementing restrictions on fishing activity, a better understanding of the overall  
37 system is crucial. Hence, fishery management should involve the economic and social  
38 sectors that affect the offer of ecosystem services within the basin, including fishing.

39

## 40 **Introduction**

41           Historically, overfishing was considered to be the main cause of fish stocks  
42 depletion in the world. This fact guided fisheries management towards a classical  
43 approach that did not adequately consider the impacts of external factors, either because  
44 they were difficult to control (1,2), or complex to characterize. This is the case in inland  
45 fisheries, being rivers the most impacted ecosystems by human activities over the past  
46 100 years. Furthermore, many activities linked to the use of natural resources that imply

47 intense human interventions take place in rives, threatening their functionality (flow  
48 rates disruption, erosion, alterations of habitats, among others) (3). As a consequence, it  
49 is imperative to study the anthropic effects on both, the environment as well as on  
50 natural fish populations, before ascribing all impacts to fishing activity (4). Therefore,  
51 as fisheries cannot be considered isolated, a multifactorial approach is required for their  
52 assessment and management (5).

53

54           According to the abovementioned, inaccurate or incomplete diagnoses of the  
55 root causes of overfishing can lead to errors in the formulation and implementation of  
56 fishing policies or programs (6). This phenomenon responds to a lack of knowledge on  
57 the impacts of other sectors (i.e., agriculture, mining, and transport, among others) in  
58 inland fisheries, which together with a northern hemisphere industrial fisheries approach  
59 (1) have resulted in the overall reduction of fishery resources. Moreover, these concepts  
60 are focused on internal factors such as size, fishing gear, reproductive seasons, and  
61 reserve areas, aimed to achieve sustainability only through their management (1,7).

62

63           Within this reference frame, artisanal fisheries in the Magdalena River basin  
64 show a decline in their discharges from average production of 70 000 t per year (in the  
65 1970s) to about 30 000 t per year (8). In the same time, the basin has been altered by  
66 various activities potentially causing environmental impacts on fish populations and,  
67 therefore, on fishing activity. Moreover, according to Restrepo and Restrepo (9), 63%  
68 of the original ecosystems of the basin have been altered. Rodríguez-Becerra (10) found  
69 that 80% of the GDP of Colombia, 70% of the hydraulic energy, 95% of the  
70 thermoelectricity, 70% of the agriculture and 90% of the coffee are produced in the  
71 basin of the Magdalena River; however, the effect of all these activities on fishing

72 production remains unknown. This development within the basin could affect fish  
73 breeding, survival, and development of their larvae and juveniles, as well as their  
74 feeding dynamics.

75

76 The breeding behavior of fish species, particularly migratory ones –which  
77 contribute to a large proportion of the fish production in the Magdalena River– is  
78 directly related to water flow. Fish react physiologically to the hydroperiod and flooding  
79 cycles of rivers (11,12), which determine the interconnectivity of the aquatic  
80 environments in which fishes perform their breeding migrations (11,13,14). But the  
81 hydroelectric power development of the country fragments the river, interrupting the  
82 reproductive migrations that in the Magdalena-Cauca basin reaches an altitude of 1,200  
83 m above the sea level (14). Dams, storing water volumes below that altitude, affect the  
84 migrations directly and, consequently, the fishing production of those species. Likewise,  
85 another pressure factor that could be affecting fish reproduction is the presence of  
86 mercury, a gold mining subproduct, which significantly contributes to the overall  
87 contamination in the basin (15). This heavy metal is incorporated in the food chain of  
88 fishes generating impacts in their reproductive health (16,17). As a result, an inverse  
89 correlation is expected to be found between fish production of all species and variations  
90 on water flow regimes, stored water volumes, and mercury concentrations.

91

92 Fish production in a floodplain river system is also related to the environmental  
93 conditions under which fish larvae and juveniles develop. Thus, the environmental  
94 deterioration of these habitats will affect population dynamics, especially in terms of  
95 recruitment and growth. These habitats are impacted by human population growth that  
96 results in an increasing demand for the use of rivers and their surrounding land.

97 Moreover, demographic growth also disturbs the structure of aquatic ecosystems,  
98 diminishes their integrity, and influences the capacities of fish and other organisms to  
99 survive (18,19), affecting, in turn, the overall ecosystem functions (3). Therefore, as a  
100 result, we should find an inverse correlation between demographic growth in the basin  
101 and the abundance of fish in the river.

102

103           It is evident that the natural productivity of aquatic environments sustains  
104 fishery production, and that human intervention produces changes in the regimes and/or  
105 dynamics of that productivity; this occurs in particular by the increase of nutrient  
106 concentrations in the water as a result of changes in land use that also facilitate  
107 sediments transport. Thus, the clearcutting of forests leads to major waste-generating  
108 activities and multiplies erosion processes. Up to 79% of the catchment area of the  
109 Magdalena River suffers severe erosion conditions partly because of the deforestation of  
110 more than 70% of its natural forests, a process that took place from 1980 to 2010 (20).  
111 According to Kjelland et al. (17), high sediment loads in the water affect the feeding  
112 behavior of fish and impacts the trophic structure (predator-prey relation). Therefore, an  
113 adverse effect of decreasing forest cover on fish populations would be expected.

114

115           Accordingly, the aim of this research was to respond to how much and to what  
116 extent the external factors to fisheries affect fish production.

117

118

119

120

## 121 **Materials and Methods**

### 122 **Description of the study area**

123           The Magdalena River basin is the main watershed in Colombia (South  
124 America), with a drainage area of 257,400 km<sup>2</sup>, comprised by two large inter-Andean  
125 rivers, Magdalena River (the most important of its nature in South America) and the  
126 Cauca River; both have high, medium and low basins (21) (Fig 1). These water bodies  
127 are located within a broad spatial and altitudinal distribution (from 3,685 m down to sea  
128 level) and encompasses all ecosystems present in the Andean and Caribbean regions,  
129 with a varied and complex mosaic of biomes, resulting in a diversity of environments  
130 and organisms (22).

131

132 **Fig. 1. Study basin Magdalena-Cauca.** We present the five hydrographic zones that cover the  
133 Magdalena-Cauca river basin.

134 .

135           One hundred fifty-one sub-basins comprise the basin, 42 of which are of  
136 second-order (23), with flood plain systems covering a wide variety of environments  
137 (marshes, sandbanks, lakes, lagoons, streams, reservoirs, artificial water bodies, and  
138 channels), which form interconnected ecological units (24). In this system, the fishing  
139 activity provides at present an estimated total annual production of 30,000 t,  
140 representing a commercial value in 2010 of COP 368,863 million (US\$204 million) and  
141 providing food security for more than 175,000 people (24).

142           In terms of basin occupation, agricultural areas are predominant, representing  
143 58.20%, followed by forest and semi-natural areas (28.71%), urban and industrial areas  
144 (0.85%), wetlands areas (2.75%) and water bodies (2.57%), being this last one of vital  
145 importance in the basin context (9,21). The basin crosses 19 departments and 128

146 municipalities and offers the ideal conditions for the development of several important  
147 urban centers, with a total population of 32 million people.

148

## 149 **Predictor environmental variables**

150 Different environmental and demographic variables were analyzed (water flow,  
151 forest cover, gold production, demography, stored water volume, and sediments) in  
152 relation to the behavior of fishing production in the Magdalena-Cauca river basin, to  
153 study how environmental changes impacted fishing production between 1980 and 2015.

154

155 These variables were selected according to the following criteria: water flow  
156 changes and stored water area as they affect migratory patterns and natural dynamics of  
157 species; mercury, as it affects the reproductive health of species; forest cover,  
158 demographic growth, and sediments as they are considered as a proxy for changes in  
159 water quality, alteration of environments and modification of natural productivity  
160 regimes generated by the increased nutrient content in its waters.

161

162 The historical information of the annual hydrological data (1975-2015) was  
163 provided by Instituto de Hidrología, Meteorología y Estudios Ambientales (IDEAM)  
164 [Institute of Hydrology, Meteorology and Environmental Studies IDEAM] and included  
165 monthly average water flow series obtained at the Calamar weather station on the main  
166 channel in the lower Magdalena River basin. The database of the total stored water  
167 volume in the basin was compiled by our team based on the list of water reservoirs in  
168 the basin, information provided by Jiménez-Segura et al. (2011); the parameters  
169 considered were: year of construction, effective volume ( $M \cdot m^3$ ) and altitude (meters  
170 above the sea level). These values were estimated for the area above and below 1,200 m

171 a.s.l., as this altitude is considered as the limit for migratory fish distribution. To  
172 analyze mercury concentration associated with gold mining, we considered the total  
173 annual gold production in the department of Antioquia in  $\text{kg}\cdot\text{year}^{-1}$  since more than 60%  
174 of the gold (vein and alluvial) produced in the Magdalena River basin comes from this  
175 region. The data was obtained from Sistema de Información Minero Energético  
176 (SIMCO) [Mining and Energy Information System (SIMCO)  
177 ([https://www1.upme.gov.co/InformacionCifras/Paginas/Boletin-estadistico-de-](https://www1.upme.gov.co/InformacionCifras/Paginas/Boletin-estadistico-de-ME.aspx)  
178 [ME.aspx](https://www1.upme.gov.co/InformacionCifras/Paginas/Boletin-estadistico-de-ME.aspx))], and the historical records from Ministerio de Minas y Energía [Ministry of  
179 Mines and Energy) ([https://biblioteca.minminas.gov.co/pdf/1989%20-](https://biblioteca.minminas.gov.co/pdf/1989%20-%201990%20MEMORIA%20AL%20CONGRESO%20NACIONAL%20ANEXO%20HISTORICO.pdf)  
180 [%201990%20MEMORIA%20AL%20CONGRESO%20NACIONAL%20ANEXO%20](https://biblioteca.minminas.gov.co/pdf/1989%20-%201990%20MEMORIA%20AL%20CONGRESO%20NACIONAL%20ANEXO%20HISTORICO.pdf)  
181 [HISTORICO.pdf](https://biblioteca.minminas.gov.co/pdf/1989%20-%201990%20MEMORIA%20AL%20CONGRESO%20NACIONAL%20ANEXO%20HISTORICO.pdf))].

182

183           Regarding the forest area, this value was established according to the databases  
184 provided by IDEAM that describe the area covered by natural forest ( $\text{ha}\cdot\text{year}^{-1}$ ) in the  
185 Magdalena River basin between 1990 and 2016. The historical demographic records  
186 (number of persons $\cdot\text{year}^{-1}$ ) of the 19 departments within the basin, were provided by  
187 Departamento Administrativo Nacional de Estadística (DANE) [National  
188 Administrative Department of Statistics DANE], based on five censuses with  
189 projections until 2020. Regarding sediments, we analyzed them as solid flow, which is  
190 an indicator of the material transported by the water current, and registered in the main  
191 channel of the Magdalena River in its lower basin. The annual sediment transport was  
192 estimated based on the average daily time series per month ( $Q_s\cdot t\cdot d^{-1}$ ) (20,23).

193



## 194 **Response variable**

195           The response variable analyzed was the total fishery production of the basin in  
196 t·year<sup>-1</sup> for the period 1975 to 2015, presented by Barreto (8). This database allowed us  
197 to estimate the percentage contribution of migratory and non-migratory species to  
198 fishery production over time.

199

## 200 **Information processing and analysis**

201           The variables were tabulated in a single database. The starting point for the  
202 analysis was the year 1980, and we included variable entries until the year 2015. The  
203 gaps in the information were filled with synthetic data estimated using the regression  
204 trend technique. In all cases, both retrospective and prospective projections showed an  
205 error within a range of about 1%.

206

207           With the collected and estimated information, we built a 36 x 9 matrix (years x  
208 variables) (S1 Text). We first scanned the data to establish the distribution pattern of the  
209 variables (with or without normal distribution). Datamining established non-parametric  
210 models as a path, so we decided to use the Generalized Additive Models (GAM) of  
211 Hastie and Tibshirani (25). This technique allowed the adjustment of statistical models,  
212 as well as the study of natural phenomena with non-linear complexity behavior (26),  
213 which, aligned with the ecological theory (27), provides a greater possibility of  
214 controlling the confounding variables (28,29). GAM corresponded to the following  
215 equation:

216

$$y = \alpha + \sum_{i=1}^n f_i(X_i) + \varepsilon$$

217

218           Where  $y$  was the response variable,  $X_i$  the predictors,  $\alpha$  a constant and  $\varepsilon$  the  
219 error. The  $f_i$  parameters for the non-parametric and Gaussian functions were estimated  
220 using smoothing spline ( $s$ ) based on (27). In the GAM diagnostic process, we included  
221 the significance value ( $p$ ), the calculation of the percentage of deviance explained by the  
222 model, and the Akaike information criterion (AIC). The software used was R (30).  
223 Thus, with the response variable (fish production) and the different predictor variables,  
224 we created 203 combinations allowing us to run 35 models (S1 File). We selected the  
225 model that best explained fish production behavior in the Magdalena River basin, based  
226 on the deviance and the AIC values. For precision purposes and considering the variable  
227 stored water volume, the five models that simultaneously crossed "water volume stored  
228 below 1200 m a.s.l., and total stored water volume for the entire basin" were discarded,  
229 as the second includes the first.

230

231           Considering how relevant water flows are for fish, and because flow patterns  
232 have a bimodal behavior in this particular basin, we estimated the maximum water flow  
233 value for each semester of every year and then calculated the difference among those  
234 values for the period between 1975 and 2015. We graphed the water flow differences  
235 vs. fish production and applied a two-period moving average.

236

## 237 **Results**

238           Fishery production in the Magdalena River showed two periods of abundance;  
239 the first period (1980-1991) with higher fish production records but larger fluctuations,  
240 and the second period (1992-2015) with lower fish production records and smaller  
241 fluctuations with a trend towards stability (Fig 2). According to the statistical records,

242 non-migratory species began to be reported in the early 1990s, showing an average  
243 contribution to fisheries production of 4% compared to the 96% for migratory species.  
244 Non-migratory species represent 11% of the fisheries production between 2010 and  
245 2015.

246

247 **Fig 2. Estimated fishing production (t) for the Magdalena-Cauca River Basin between the years**  
248 **1975 and 2015.** The data analyzed corresponds to the period from 1980 to 2015 (dark line). Source: (8).

249

250 The correlation between fisheries production and the differences in the  
251 maximum amplitude of water flows showed a coupling between both variables (Fig 3).  
252 In general terms, the fishery production curve presented the same shape and pattern as  
253 the curve generated by the moving averages; that result suggests a strong influence of  
254 water flow regime on fish abundance in the system (Fig 3). In 1992, after significant  
255 fluctuations, the average water flow decreased by 1% during the dry season and  
256 increased by 7% during the rainy season. Regarding the magnitude of the water flow  
257 differences observed between the years, after 1992, the magnitude of the differences  
258 became more stable and coincided with a period of a low and stable fish production (Fig  
259 2 and Fig 4a).

260

261 **Fig. 3. Moving average between the difference of maximum water flow rates in the first and second**  
262 **semesters of each year and its correlation with fishing production between the years 1975 and 2015.**

263 The thick black line shows the behavior of fish production over time and the thin black line the maximum  
264 water flow value for each semester of every year.

265

266 **Fig. 4. Behavior of predictor variables during the period between 1980 to 2015 in the Magdalena-**  
267 **Cauca River Basin.** (a) water flows ( $m^3 \cdot s^{-1}$ ); (b) total stored water volume ( $Mm^3$ ); (c) stored water  
268 volume  $< 1,200$  m a.s.l.; (d) gold production (kg); (e) forest cover (ha); (f) demographic growth (number  
269 of people  $\times 1000$ ); (g) sediments ( $Qs \cdot t \cdot d^{-1}$ ).

270

271 It is noteworthy that the period when the difference in water flow became  
272 minimal (from 1982 to 1983), was followed by a significant reduction in fish production  
273 (Fig 3); likewise, in the following years, when the difference in water flow recovered,  
274 the same happened with the fish production. From 1992 and onwards, when reductions  
275 and fluctuations in water flow differences decreased and remained steady, fisheries  
276 production also behaved in this same way.

277

278 Regarding the volumes of stored water, for both the total and below 1,200  
279 m.a.s.l., these values showed a gradual increase with strong increments in the periods  
280 1986-1988 and 2004-2006; eventually, the most significant increase occurred from 2013  
281 to the present day (Fig 4b and c). These increases are related to the progressive  
282 implementation and operation of the main dams in the basin. In turn, the first main  
283 increase in the total water volume stored and the one below 1,200 m a.s.l. occurred in  
284 1986 and concurs with the reduction in fish production, suggesting a change in the  
285 environmental dynamics of the river that prevented fish populations from recovering  
286 their previous abundance (Fig 2 and 4c).

287

288 Gold production showed a rapid increase between 1980 and 1986, followed by  
289 a steady decrease until 1994, before showing a continuous but fluctuating upward trend  
290 (Fig 4d). It should be noted that fish production decreased right after gold production

291 reached its highest value (Fig 2), suggesting a slightly delayed effect of mercury  
292 contamination due to gold mining on fish stocks.

293

294 The reduction of the forest area was continuous and progressive during the  
295 entire study period (Fig 4e). The same can be observed for demographic growth (Fig  
296 4f).

297

298 Concerning the sediment fluctuation over time, the change in the magnitude of  
299 the maximum values after 1986 is noteworthy (Fig 4g). From that year onwards, the  
300 maximum values are approximately 30% higher than in previous years, corresponding  
301 also with the moment when the first dam started operations and with the decrease in  
302 fishing production (Fig 2).

303

304 Figure 5 presents the functional correlations between fish production and the  
305 predictor variables. Of the 30 models that were selected, 27 reported synergy between  
306 the different variables and presented an explained deviance of more than 60% on fish  
307 production behavior (Table 1).

308

309 **Figure 5. Functional correlations between fish production and predictor variables.** Sediments (a),  
310 Water flow (b), Natural forest cover (c), Demographic growth (d), Total stored water volume (e), Stored  
311 water volume below 1200 m.a.s.l. (f) and gold production (g). The dotted lines represent the confidence  
312 intervals.

313

314

315

316

317 **Table 1. Results of the Generalized Additive Models (GAM) modeling between fishery production**  
 318 **(t) and predictor variables, the percentage of the explained deviance by the model, and the AIC.**

| Model | Predictor variable 1 | Predictor variable 2               | Predictor variable 3               | Explained deviance (%) | AIC     |
|-------|----------------------|------------------------------------|------------------------------------|------------------------|---------|
| 1     | forest cover         | demographic growth                 | stored water volume <1200 m a.s.l. | 96.4                   | 677.957 |
| 2     | water flows          | demographic growth                 | total stored water volume          | 96.2                   | 680.666 |
| 3     | demographic growth   | stored water volume <1200 m a.s.l. | gold production                    | 96.5                   | 681.077 |
| 4     | sediments            | demographic growth                 | total stored water volume          | 96.2                   | 681.146 |
| 5     | forest cover         | demographic growth                 | total stored water volume          | 96.1                   | 682.314 |
| 6     | water flows          | demographic growth                 | stored water volume <1200 m a.s.l. | 96.0                   | 683.249 |
| 7     | demographic growth   | total stored water volume          | gold production                    | 96.0                   | 683.405 |
| 8     | sediments            | demographic growth                 | stored water volume <1200 m a.s.l. | 95.9                   | 683.752 |
| 9     | water flows          | forest cover                       | demographic growth                 | 93.7                   | 695.188 |
| 10    | sediments            | forest cover                       | demographic growth                 | 93.7                   | 695.213 |
| 11    | forest cover         | stored water volume <1200 m a.s.l. | gold production                    | 92.7                   | 696.152 |
| 12    | sediments            | stored water volume <1200 m a.s.l. | forest cover                       | 92.5                   | 697.446 |
| 13    | water flows          | forest cover                       | stored water volume <1200 m a.s.l. | 92.4                   | 697.903 |
| 14    | forest cover         | total stored water volume          | gold production                    | 92.5                   | 700.451 |
| 15    | sediments            | water flow                         | demographic growth                 | 91.7                   | 700.540 |
| 16    | sediments            | forest cover                       | total stored water volume          | 92.4                   | 701.221 |
| 17    | water flows          | forest cover                       | total stored water volume          | 92.3                   | 702.011 |
| 18    | sediments            | water flow                         | forest cover                       | 89.3                   | 709.519 |
| 19    | forest cover         | demographic growth                 | gold production                    | 84.9                   | 717.187 |
| 20    | sediments            | demographic growth                 | gold production                    | 82.9                   | 719.654 |
| 21    | water flows          | demographic growth                 | gold production                    | 82.6                   | 720.562 |
| 22    | water flows          | total stored water volume          | gold production                    | 80.5                   | 732.659 |
| 23    | sediments            | total stored water volume          | gold production                    | 80.8                   | 732.859 |
| 24    | sediments            | forest cover                       | gold production                    | 64.1                   | 740.352 |
| 25    | water flows          | forest cover                       | gold production                    | 61.7                   | 743.293 |
| 26    | sediments            | water flow                         | total stored water volume          | 70.5                   | 746.525 |
| 27    | sediments            | stored water volume <1200 m a.s.l. | gold production                    | 45.7                   | 754.435 |
| 28    | water flows          | stored water volume <1200 m a.s.l. | gold production                    | 49.0                   | 754.798 |
| 29    | sediments            | water flow                         | gold production                    | 61.7                   | 755.202 |
| 30    | sediments            | water flow                         | stored water volume <1200 m a.s.l. | 30.9                   | 761.172 |

319 The highlighted cell shows the variables that best predicted the modeling with the fishery production of the  
 320 Magdalena River Basin, Colombia. All models showed a  $p < 0.05$ .

321

322 The environmental variable that best forecasted the fishery production was  
 323 forest cover, meanwhile at a productive level, it was the total volume of stored water,  
 324 and, at a demographic level, it was population growth ( $p < 0.05$ , higher explained  
 325 deviance and lower AIC) (Table 2). Fishing production was high since there was a large  
 326 forest cover, low total water stored volume levels, and a low population in the basin.

327 The highest production records, which occurred between 1980 and 2015, were  
 328 associated with water flows between 7,000 and 8000  $m^3 \cdot s^{-1}$ , population densities under  
 329 26 million people in the basin, forest cover over 6 million hectares, stored water  
 330 volumes of 3,000  $Mm^3$  in reservoirs located below 1,200 m a.s.l., total water stored  
 331 volume of 7,500  $Mm^3$ , a maximum of 20,000 kg of gold, and sediment rates higher  
 332 than 60,000  $Qs \cdot t \cdot d^{-1}$  (Figure 5).

333

334

335 **Table 2. GAM modeling results between fishery production and each of the type of variable.**

| Type of variable     | Factor                             | Explained deviance (%) | AIC     | p-value |
|----------------------|------------------------------------|------------------------|---------|---------|
| <b>Environmental</b> | forest cover                       | 89.8                   | 703.764 | 0.000   |
| <b>Environmental</b> | sediments                          | 38.5                   | 765.161 | 0.100   |
| <b>Environmental</b> | water flows                        | 7.47                   | 769.071 | 0.431   |
| <b>Demographic</b>   | population growth                  | 88.6                   | 707.182 | 0.000   |
| <b>Productive</b>    | gold production                    | 27.9                   | 764.569 | 0.100   |
| <b>Productive</b>    | total stored water volume          | 70.5                   | 741.004 | 0.000   |
| <b>Productive</b>    | stored water volume <1200 m a.s.l. | 38.5                   | 766.312 | 0.110   |

336 Percentage of the explained deviance by the model, the Akaike criterion (AIC), and the p-value.

337

338

## 339 **Discussion**

340           The findings confirmed that the environmental variables of the Magdalena  
341 River basin explained at least 60% of the reduction in fish production. This showed that  
342 the conventional fishery management paradigm, in which overfishing is considered to  
343 be the principal factor in the deterioration of fish stocks, is erroneous.

344

345           The most significant productive interventions were: i) the increase of human  
346 population within the basin is translated into deforestation and transformation of land  
347 use, and in turn, this alters sediment dynamics and affects the quality of the river  
348 environments and the flood plains; ii) the construction of reservoirs and dams which  
349 interfered in various ways with the reproduction processes of the main species, by  
350 modifying water flows and altering the migratory patterns, fragmenting populations  
351 with the presence of barriers, reducing dispersion and reproduction areas and,  
352 attenuating water flow regimes necessary to guarantee appropriate flood pulses for fish  
353 breeding; iii) the substantial increase in gold production which, apparently in its initial  
354 phase, generated a hazardous level of pollution affecting fish reproduction processes,  
355 and fishing production.

356

357           The variability of fish production since 1992 stabilized at a low level without  
358 recovering. The above indicates the crossing of some thresholds that not only prevented  
359 larger fish production from being sustainable but also condemning it to a negative trend.  
360 Some of these thresholds are: i) fluctuation of water flows between years exceeded  
361  $8,000 \text{ m}^3 \cdot \text{s}^{-1}$ , ii) the stored water volume was over  $3,000 \text{ Mm}^3$ , iii) gold production  
362 exceeded  $20,000 \text{ kg}$ , iv) the forest area decreased by 6 million ha, and v) suspended  
363 solids exceeded  $400,000 \text{ Qs} \cdot \text{t} \cdot \text{d}^{-1}$  at a certain point during the year.



364 We consider that since 1992, the decrease in water flow during the upriver or  
365 upstream migration (*subienda* in Spanish) during the summer season (6.4% on average)  
366 affected the migratory and reproductive processes of the species and, as mentioned by  
367 Ellis et al. (2016), as the biological rhythms of fish are modified, the opportunities for  
368 spawning, growing and dispersing are affected. Two processes are involved in this  
369 context: water flow must decrease sufficiently for shoals to be able to swim upstream,  
370 but afterward, the water flow must increase enough to generate flooded zones where  
371 larvae and juveniles are bred (14). The abovementioned led us to highlight those  
372 "sacred" flood pulses in the Magdalena-Cauca river basin as crucial. In addition, we  
373 evidenced an indirect correlation between fish production and water flows; the  
374 modeling results showed an optimal water flow ranges ( $7,000-8,000 \text{ m} \cdot \text{s}^{-1}$ ), during  
375 which higher fish productions were generated. Extreme flow rates, especially for low  
376 values, are related to low productions.

377

378 Hydroelectric power plants have been built both in the main channel as well as  
379 in the tributaries of the Magdalena-Cauca rivers, altering water flows by regulating  
380 them seasonally and "daily" (pulses known as "hydropeaking"). These changes,  
381 according to Gillson (31), are agents that modify the richness and diversity of species,  
382 and therefore, fishing production in the rivers. There is a total of 39 reservoirs in the  
383 basin, storing about  $16,800 \text{ Mm}^3$ , i.e., 73% more than the total volume stored in 1980.  
384 Thus, as the total stored water volume in the basin increased, fishing production  
385 decreased. Furthermore, in several sectors downstream of the dams, a 58% reduction of  
386 migratory species was detected in the Magdalena-Cauca Basin between 1980 and 2015.  
387 This pattern was also reported by Agostinho et al. (32) and Lacerda et al. (33) for other  
388 basins.

389           Considering this context, we propose that the habitat loss, the blockage of  
390 migratory routes and the loss of connectivity associated with the fragmentation of  
391 corridors between flood plains, have altered and are still altering the reproductive  
392 habitat as well as the fish recruitment and, consequently, fishing production. This is  
393 aligned with what has also been discussed and published by various authors (14,34–38)  
394 for similar systems.

395  
396           When evaluating gold production as a proxy for mercury pollution, we  
397 consider that the intensive extraction that took place in the late 80s, led to a prolonged  
398 impact (contamination), as the accumulation in the sediments and bioaccumulation in  
399 the food chain continued to affect fish populations in later periods. Recent studies  
400 showed that in Colombia, between 80 and 100 t of mercury are released annually; its  
401 presence has been reported in more than 13 fish species in the basin, with  
402 concentrations higher than 0.2 µg of Hg per gram of fresh mass, making them  
403 unsuitable for human consumption (39). Mercury concentrations are generating impacts  
404 on the reproductive health of fish, detected on the alteration of sex ratios, and the  
405 reduction of the survival capacity of the offspring, also mentioned by Kjelland et al.  
406 (17) and Crump and Trudeau (16). We consider that mercury concentration is a highly  
407 hazardous factor, given its impact on human health.

408  
409           Deforestation associated with the transformation of aquatic ecosystems through  
410 land-use changes has also influenced fisheries production. In the Magdalena River  
411 Basin, forest cover decreased by 32% and fishery production by 44% between 1980 and  
412 2015. Therefore, to reach higher fish production rates, the forest area must equal what  
413 was found 28 years ago, i.e., 6.6 million hectares. Clearly, deforestation has led to

414 changes in aquatic ecosystem conditions, which have affected fish production. This  
415 agrees with Castello et al. (40), who found that deforestation of the floodplain in the  
416 lower Amazon River basin was the main variable that explained variability in the  
417 reduction of fishing yields.

418

419 In terms of demographic growth, we confirmed the hypothesis that the higher  
420 the population growth, the lower the fish production; therefore, it can be used as a proxy  
421 for the alteration of water quality in the basin. This is because urbanization and human  
422 activities lead to large urban wastewater discharges into the rivers, which affect the  
423 water quality and life of aquatic organisms. Fishing production in the basin had its  
424 largest records in the 80s when less than 26 million people were living in the basin;  
425 however, currently, the basin has about 6 million more inhabitants. The anthropic  
426 pressure on water use (agricultural and livestock sectors), together with moderate to low  
427 water regulation, have led 66% of the area of the Magdalena River Basin to show  
428 critical, very high and high levels, as well as to a moderate to low water regulation,  
429 according to the National Water Evaluation carried out by Instituto de Hidrología,  
430 Meteorología y Estudios Ambientales (41).

431

432 According to the abovementioned and also suggested by Couceiro et al. (42)  
433 and Amisah and Cowx (18) for other regions, population growth is mirrored by the  
434 demand for river uses, which disrupts the structure of aquatic ecosystems by  
435 diminishing their integrity and influencing the ability of fish and other organisms to  
436 survive; likewise, as a consequence of this water use, eutrophication processes have  
437 been registered in the flood plains of the Magdalena River Basin such as the Zapatosá  
438 marsh (43).

439

440           Regarding sediment loads, our results indicated that fish production increased  
441 at higher sediment values. This led us to reconsider the hypothesis that sediment loads  
442 over the past two decades were stimulating accelerated sedimentation processes in the  
443 marshes. This situation is observed in the field and reported by the fishers as one of  
444 their biggest challenges. Nonetheless, Restrepo et al. (20) indicate that despite increased  
445 erosion, some of the sediments are being retained in the tributaries and, therefore, never  
446 reached the main channel (Magdalena River) as previously assumed. However, there is  
447 no doubt that sediments are related to flood pulses and nutrient cycles to the extent that  
448 there is a correlation between these sediments, flood pulses, and fish production.

449

450           At the same time, Baran et al. (5), in other systems such as the Mekong River,  
451 demonstrated that a reduction of 80% of the sediment input decreases total fish biomass  
452 by 36%. Historical records in the Lower Magdalena River Basin indicated that in the  
453 years after 1993, sediment input decreased in both the dry and wet months. Further,  
454 Jiménez-Segura et al. (14) warn us about changes in the sediment dynamics of the river  
455 due to the future implementation of hydroelectric generation projects (205 new dams by  
456 the year 2027) that will increase the energy production in Colombia by a factor of four  
457 (24 000 MW).

458

459           This reality in the Magdalena-Cauca river basin has encouraged urgent appeals  
460 to Colombian environmental institutions to implement real strategies for fisheries  
461 management with an ecosystem, inter-sectoral (44) and fish conservation approach,  
462 considering that the trans-Andean basins of the Caribbean region are the core of the  
463 economic development of Colombian society (45). We agree that a basin-wide approach

464 is necessary, including cumulative effects and also climate variability, which merits  
465 immediate and coordinated intervention within the framework of strengthening inter-  
466 sectoral governance of fisheries. It is clear that the decline in ecosystem services and the  
467 associated severe socio-economic and environmental impacts will be increasingly  
468 challenging to reverse or mitigate these, affecting thousands of coastal inhabitants  
469 whose livelihoods depend or not on fisheries.

470

471 To summarize, the results obtained allowed us to conclude that the decrease in  
472 fish abundance was in large proportion due to environmental causes. We consider that  
473 fishing activity and landings responded more to the environmental state of the  
474 ecosystems than to any sort of approach in fisheries management. We consider that  
475 fishers in recent years have self-regulated towards new levels of abundance and that  
476 fishery authorities should be more supportive towards good fishing practices that the  
477 fishers have adopted for their survival, as a result of the reality they perceive every day.  
478 Surely, making fishers responsible for the decrease in fish production is a misguided  
479 argument, and, before trying to implement restrictions on fishing activity, a better  
480 understanding of the entire system and its dynamics is necessary. Recently, different  
481 approaches have been discussed, like the concept of balanced exploitation (46), which  
482 considers that fishing pressure should be distributed in proportion to the natural  
483 productivity of ecosystems, forcing, in our case, a response to environmental dilemmas.  
484 We consider that the system has already been adjusted to a lower level and found a new  
485 balance. Therefore, the implementation of classical fisheries management based on the  
486 overfishing paradigm is no longer sustainable, and managers of artisanal fisheries can  
487 no longer avoid external factors. Moreover, fisheries management must involve the

488 different economic and social sectors that affect the different ecosystem services  
489 provided by the basin.

490

## 491 **Supporting information**

492 **S1 Text Database of the different environmental, productive, and demographic variables analyzed**

493 **concerning the behavior of fishing production in the Magdalena-Cauca river basin.** The total fishery

494 production of the basin in  $t \cdot year^{-1}$  was obtained of (8). The average water flow series were provided by

495 Instituto de Hidrología, Meteorología y Estudios Ambientales (IDEAM) [Institute of Hydrology,

496 Meteorology and Environmental Studies (IDEAM)]. The total stored water volume in the basin (effective

497 volume  $M \cdot m^3$ ) was compiled by our team based on the list of water reservoirs in the basin, information

498 provided by (47). These values were estimated for the area above and below 1,200 m a.s.l.. The total

499 annual gold in  $kg \cdot year^{-1}$  was obtained from Sistema de Información Minero Energético (SIMCO) [Mining

500 and Energy Information System (SIMCO)

501 (<https://www1.upme.gov.co/InformacionCifras/Paginas/Boletin-estadistico-de-ME.aspx>), and the

502 historical records from Ministerio de Minas y Energía [Ministry of Mines and Energy)

503 ([https://biblioteca.minminas.gov.co/pdf/1989%20-](https://biblioteca.minminas.gov.co/pdf/1989%20-%201990%20MEMORIA%20AL%20CONGRESO%20NACIONAL%20ANEXO%20HISTORICO.pdf)

504 [%201990%20MEMORIA%20AL%20CONGRESO%20NACIONAL%20ANEXO%20HISTORICO.pdf](https://biblioteca.minminas.gov.co/pdf/1989%20-%201990%20MEMORIA%20AL%20CONGRESO%20NACIONAL%20ANEXO%20HISTORICO.pdf)

505 ]. The forest area ( $ha \cdot year^{-1}$ ) between 1990 and 2016 was provided by IDEAM. Between 1980 to 1989

506 the gaps in the information were filled with synthetic data estimated using the regression trend technique.

507 Prospective projections showed an error within a range of about 1%. The historical demographic records

508 (number of persons  $\cdot year^{-1}$ ) of the 19 departments within the basin, were provided by Departamento

509 Administrativo Nacional de Estadística (DANE) [National Administrative Department of Statistics

510 DANE]. The annual sediment transport (solid flow) was estimated based on the average daily time series

511 per month ( $Q_s \cdot t \cdot d^{-1}$ ) (20,23). (DOCX)

512 DOI 10.17605 / OSF.IO / 268XB

513

514 **S1 File. Contains scripts used to develop the generalized additive models (GAMs).** The application of

515 the GAMs also included the development of various tests such as verification of residual deviance against

516 the theoretical quartiles, analysis of residues against the line of prediction, histogram of the residues,

517 graph of the response variable against the estimated values. Likewise, we checked the handling of  
518 multidimensional planes (K, edf, k-index and p-value). The software used was RStudio (FILE R)  
519 DOI 10.17605 / OSF.IO / 268XB

520

## 521 **Author Contributions**

522 Conceptualization: SHB MVB LSS WS, Methodology: SHB CGBR, Formal  
523 analysis and Data Curation: CGBR, Investigation: SHB, Writing - Original Draft: SHB  
524 LSS, Project administration: SHB, Writing - Review & Editing: MVB WS, Supervision:  
525 WS

526

## 527 **Acknowledgements**

528 We thank Fundación Humedales for supporting the main author and her  
529 technical team in the field research and surveys. To Dr. Darío Restrepo for sharing with  
530 us and let us use his sediment database. To Dr. Katty Camacho for reviewing the paper  
531 and Julia Pérez Sillero and Karen Amaya Vecth for language support. To the Instituto  
532 de Hidrología, Meteorología y Estudios Ambientales - IDEAM- (Institute of Hydrology,  
533 Meteorology and Environmental Studies) for the provision of environmental  
534 information variables of the Magdalena - Cauca river basin. To the UNED- Costa Rica  
535 DOCINADE doctoral program for its guidance to the main author

536

## 537 **References**

- 538 1. Kolding J, van Zwieten PAM. The Tragedy of Our Legacy: How do Global  
539 Management Discourses Affect Small Scale Fisheries in the South? Forum for  
540 Development Studies [Internet]. 2011 Nov [cited 2020 Jan 20];38(3):267–97.  
541 Available from:  
542 <http://www.tandfonline.com/doi/abs/10.1080/08039410.2011.577798>

- 543 2. Kolding, J, Mombo F, Temu, B, Nyanghura, Q, Cunliffe, R. Technical advisory  
544 services for biodiversity conservation and wetland management in Kilombero  
545 Valley Ramsar Site. Tanzania; 2017 Jun p. 76.
- 546 3. Welcomme RL, Cowx IG, Coates D, Bene C, Funge-Smith S, Halls A, et al.  
547 Inland capture fisheries. *Philosophical Transactions of the Royal Society B:*  
548 *Biological Sciences* [Internet]. 2010 Sep 27 [cited 2017 Oct 16];365(1554):2881–  
549 96. Available from:  
550 <http://rstb.royalsocietypublishing.org/cgi/doi/10.1098/rstb.2010.0168>
- 551 4. Caddy J. Marine catchment basin effects versus impacts of fisheries on semi-  
552 enclosed seas. *ICES Journal of Marine Science* [Internet]. 2000 Jun [cited 2018  
553 May 23];57(3):628–40. Available from: [https://academic.oup.com/icesjms/article-](https://academic.oup.com/icesjms/article-lookup/doi/10.1006/jmsc.2000.0739)  
554 [lookup/doi/10.1006/jmsc.2000.0739](https://academic.oup.com/icesjms/article-lookup/doi/10.1006/jmsc.2000.0739)
- 555 5. Baran E, Groupe consultatif pour la recherche agricole internationale, Research  
556 program on water land and ecosystems, Guerin E, Nasielski J, Worldfish Center.  
557 Fish, sediment and dams in the Mekong. Penang, Malaysia: WorldFish : CGIAR  
558 Research program on water, land and ecosystems; 2015.
- 559 6. Finkbeiner EM, Bennett NJ, Frawley TH, Mason JG, Briscoe DK, Brooks CM, et  
560 al. Reconstructing overfishing: Moving beyond Malthus for effective and equitable  
561 solutions. *Fish Fish* [Internet]. 2017 Nov [cited 2019 Oct 15];18(6):1180–91.  
562 Available from: <http://doi.wiley.com/10.1111/faf.12245>
- 563 7. Mosepele K. Classical Fisheries Theory and Inland (Floodplain) Fisheries  
564 Management; Is there Need for a Paradigm Shift? Lessons from the Okavango  
565 Delta, Botswana. *Fish Aquac J* [Internet]. 2014 [cited 2019 Oct 14];5(3). Available  
566 from: [https://www.omicsonline.org/open-access/classical-fisheries-theory-and-](https://www.omicsonline.org/open-access/classical-fisheries-theory-and-inland-floodplain-fisheries-management-is-there-need-for-a-paradigm-shift-lessons-from-the-okavango-delta-botswana-2150-3508.1000101.php?aid=30442)  
567 [inland-floodplain-fisheries-management-is-there-need-for-a-paradigm-shift-](https://www.omicsonline.org/open-access/classical-fisheries-theory-and-inland-floodplain-fisheries-management-is-there-need-for-a-paradigm-shift-lessons-from-the-okavango-delta-botswana-2150-3508.1000101.php?aid=30442)  
568 [lessons-from-the-okavango-delta-botswana-2150-3508.1000101.php?aid=30442](https://www.omicsonline.org/open-access/classical-fisheries-theory-and-inland-floodplain-fisheries-management-is-there-need-for-a-paradigm-shift-lessons-from-the-okavango-delta-botswana-2150-3508.1000101.php?aid=30442)
- 569 8. Barreto, R. CG. Producción pesquera de la Cuenca del río Magdalena:  
570 desembarcos y estimación ecosistémica [Internet]. Bogotá, Colombia: The Nature  
571 Conservancy, Mac Arthur Foundation, AUNAP; 2017 [cited 2018 Jan 15] p. 38.  
572 Available from: <http://sepec.aunap.gov.co/Home/VerPdf/63>
- 573 9. Restrepo JC, Restrepo JD. Efectos naturales y antrópicos en la producción de  
574 sedimentos de la cuenca del río Magdalena. *Revista de la Academia Colombiana*  
575 *de Ciencias Exactas, Físicas y Naturales*. 2005;29(111):239–254.
- 576 10. Rodríguez-Becerra M. Lo que va nos va quedando del río. In: *¿Para dónde va El*  
577 *Río Magdalena? Riesgos sociales, ambientales y económicos del proyecto de*  
578 *navegabilidad*. Primera. Bogotá, D.C., Colombia: Friedrich-Ebert-Stiftung en  
579 Colombia; 2015. p. 18–37. (Foro Nacional Ambiental).
- 580 11. Welcomme, RL. Pesca fluvial [Internet]. 1992 [cited 2017 Oct 21]. Available  
581 from: <http://www.fao.org/docrep/003/T0537S/T0537S00.HTM#toc>
- 582 12. Petry AC, Agostinho AA, Gomes LC. Fish assemblages of tropical floodplain  
583 lagoons: exploring the role of connectivity in a dry year. *Neotropical Ichthyology*.  
584 2003;1(2):111–119.



- 585 13. Jiménez-Segura LF, Palacio, J, López, R. Características biológicas del Blanquillo  
586 (Sorubim cuspicaudus) Littmann, Burr y Nass, 2000 y Bagre rayado  
587 (Pseudoplatystoma magdaleniatum) Buitrago-Suárez y Burr, 2007 (Siluriformes:  
588 Pimelodidae) relaciones con su reproducción en la cuenca media. Actual Biol  
589 [Internet]. 2009;31(90):53–66. Available from:  
590 <http://www.scielo.org.co/pdf/acbi/v31n90/v31n90a5.pdf>
- 591 14. Jiménez-Segura LF, Restrepo-Santamaría D, López-Casas S, Delgado J,  
592 Valderrama M, Álvarez J, et al. Ictiofauna y desarrollo del sector hidroeléctrico en  
593 la cuenca del río Magdalena-Cauca, Colombia. Biota Colombiana. 2014;15(2):3–  
594 25.
- 595 15. Mancera-Rodríguez NJ, Álvarez-León R. Estado del conocimiento de las  
596 concentraciones de mercurio y otros metales pesados en peces dulceacuícolas de  
597 Colombia. Acta Biológica Colombiana. 2006;11(1):3–23.
- 598 16. Crump KL, Trudeau VL. Mercury-induced reproductive impairment in fish.  
599 Environmental Toxicology and Chemistry. 2009;28(5):895–907.
- 600 17. Kjelland ME, Woodley CM, Swannack TM, Smith DL. A review of the potential  
601 effects of suspended sediment on fishes: potential dredging-related physiological,  
602 behavioral, and transgenerational implications. Environment Systems and  
603 Decisions [Internet]. 2015 Sep [cited 2017 Oct 22];35(3):334–50. Available from:  
604 <http://link.springer.com/10.1007/s10669-015-9557-2>
- 605 18. Amisah S, Cowx IG. Response of the fish populations of the River Don in South  
606 Yorkshire to water quality and habitat improvements. Environmental Pollution.  
607 2000;108(2):191–199.
- 608 19. Population & Sustainability Network. Population dynamics and biodiversity: A  
609 PSN Briefing Paper [Internet]. 2012 Oct [cited 2017 Jun 15] p. 14. Available from:  
610 <http://populationandsustainability.org/>
- 611 20. Restrepo JD, Kettner AJ, Syvitski JPM. Recent deforestation causes rapid increase  
612 in river sediment load in the Colombian Andes. Anthropocene [Internet]. 2015 Jun  
613 [cited 2017 Oct 16];10:13–28. Available from:  
614 <http://linkinghub.elsevier.com/retrieve/pii/S2213305415300126>
- 615 21. Instituto de Hidrología M y EA (IDEAM), Instituto Geográfico Agustín Codazzi  
616 (IGAC), Corporación Autónoma Regional del Río Grande de la Magdalena. Mapa  
617 de cobertura de la tierra Cuenca Magdalena - Cauca: metodología CORINE Land  
618 Cover adaptada para Colombia escala 1:100.000. Bogotá: Imprenta Nacional de  
619 Colombia; 2008.
- 620 22. Otero, E, Mosquera, L, Bernardi G, Guzmán, JC. Río Grande de la Magdalena -  
621 Colección Ecológica del Banco [Internet]. 2003 [cited 2017 Oct 16]. Available  
622 from: <http://imeditores.com/banocc/rio/creditos.htm>
- 623 23. Restrepo JD, Kjerfve B, Hermelin M, Restrepo JC. Factors controlling sediment  
624 yield in a major South American drainage basin: the Magdalena River, Colombia.  
625 Journal of Hydrology [Internet]. 2006 Jan [cited 2017 Oct 16];316(1–4):213–32.  
626 Available from: <http://linkinghub.elsevier.com/retrieve/pii/S0022169405002106>

- 627 24. Valderrama M, Hernández S, Pinilla M, Barreto C. Estado de las pesquerías. In:  
628 Estado de las planicies inundables y el recurso pesquero en la macrocuenca  
629 Magdalena-Cauca y propuesta para su manejo integrado. Bogotá, Colombia; 2015.  
630 p. 526.
- 631 25. Hastie T, Tibshirani R. Generalized Additive Models. *Statistical Science*  
632 [Internet]. 1986;1(3):297–318. Available from:  
633 [https://projecteuclid.org/download/pdf\\_1/euclid.ss/1177013604](https://projecteuclid.org/download/pdf_1/euclid.ss/1177013604)
- 634 26. Parra JM. Estimación de un modelo aditivo no paramétrico [Internet] [Master].  
635 [Granada]: Universidad de Granada; 2011 [cited 2017 Mar 12]. Available from:  
636 <http://masteres.ugr.es/moea/pages/tfm1011/estimacionnoparametricadeunmodeloaditivo/>  
637
- 638 27. Páramo J, Guillot-Illidge L, Benavides S, Rodríguez A, Sánchez-Ramírez C.  
639 Aspectos poblacionales y ecológicos de peces demersales de la zona norte del  
640 Caribe colombiano en relación con el hábitat: una herramienta para identificar  
641 Áreas Marinas Protegidas (AMPs) para el manejo pesquero. *Caldasia*.  
642 2009;31(1):123–144.
- 643 28. Figueiras A, Saez M, Tobias A. Utilización de métodos no paramétricos para el  
644 control de variables de confusión no observadas en estudios ecológicos de series  
645 temporales. *Gaceta Sanitaria*. 1999;13(5):417–418.
- 646 29. Sánchez GS, Rodríguez-Arango GO. Epidemiology and applied scientific method  
647 in pediatrics (VI): Confusion and interaction. *An Esp Pediatr*. 1999;51:91–96.
- 648 30. RStudio Team. RStudio: Integrated Development [Internet]. Boston, MA: R.  
649 RStudio, Inc.; 2015 [cited 2017 Jun 30]. Available from: <http://www.rstudio.com/>.
- 650 31. Gillson J. Freshwater Flow and Fisheries Production in Estuarine and Coastal  
651 Systems: Where a Drop of Rain Is Not Lost. *Reviews in Fisheries Science*  
652 [Internet]. 2011 Jul [cited 2020 May 14];19(3):168–86. Available from:  
653 <http://www.tandfonline.com/doi/abs/10.1080/10641262.2011.560690>
- 654 32. Agostinho Aa, Pelicice Fm, Gomes Lc. Dams and the fish fauna of the Neotropical  
655 region: impacts and management related to diversity and fisheries. *Brazilian*  
656 *Journal of Biology* [Internet]. 2008 Nov [cited 2018 Jun 16];68(4 suppl):1119–32.  
657 Available from: [http://www.scielo.br/scielo.php?script=sci\\_arttext&pid=S1519-69842008000500019&lng=en&tlng=en](http://www.scielo.br/scielo.php?script=sci_arttext&pid=S1519-69842008000500019&lng=en&tlng=en)  
658
- 659 33. Lacerda dos Santos NC, de Santana HS, Gonçalves-Ortega JC, Dias RM,  
660 Stegmann LF, da Silva Araújo IM, et al. Environmental filters predict the trait  
661 composition of fish communities in reservoir cascades. *Hydrobiologia* [Internet].  
662 2017 Nov [cited 2020 May 14];802(1):245–53. Available from:  
663 <http://link.springer.com/10.1007/s10750-017-3274-4>
- 664 34. Ribeiro Antonio R, Agostinho AA, Pelicice FM, Bailly D, Okada EK, Dias JHP.  
665 Blockage of migration routes by dam construction: can migratory fish find  
666 alternative routes? *Neotrop ichthyol* [Internet]. 2007 [cited 2020 May  
667 15];5(2):177–84. Available from:

- 668 [http://www.scielo.br/scielo.php?script=sci\\_arttext&pid=S1679-](http://www.scielo.br/scielo.php?script=sci_arttext&pid=S1679-)  
669 [62252007000200012&lng=en&tlng=en](http://www.scielo.br/scielo.php?script=sci_arttext&pid=S1679-62252007000200012&lng=en&tlng=en)
- 670 35. Barletta M, Jaureguizar AJ, Baigun C, Fontoura NF, Agostinho AA, Almeida-Val  
671 VMF, et al. Fish and aquatic habitat conservation in South America: a continental  
672 overview with emphasis on neotropical systems. *Journal of Fish Biology*  
673 [Internet]. 2010 Jun 9 [cited 2020 May 15];76(9):2118–76. Available from:  
674 <http://doi.wiley.com/10.1111/j.1095-8649.2010.02684.x>
- 675 36. Pereira Arantes F, Batista dos Santos H, Rizzo E, Sato Y, Bazzoli N. Collapse of  
676 the reproductive process of two migratory fish (*Prochilodus argenteus* and  
677 *Prochilodus costatus*) in the Três Marias Reservoir, São Francisco River, Brazil:  
678 Collapse of the reproductive process. *Journal of Applied Ichthyology* [Internet].  
679 2011 Jun [cited 2019 Oct 16];27(3):847–53. Available from:  
680 <http://doi.wiley.com/10.1111/j.1439-0426.2010.01583.x>
- 681 37. Winemiller KO, McIntyre PB, Castello L, Fluet-Chouinard E, Giarrizzo T, Nam S,  
682 et al. Balancing hydropower and biodiversity in the Amazon, Congo, and Mekong.  
683 *Science* [Internet]. 2016 Jan 8 [cited 2018 Mar 19];351(6269):128–9. Available  
684 from: <http://www.sciencemag.org/cgi/doi/10.1126/science.aac7082>
- 685 38. Angarita H, Wickel AJ, Sieber J, Chavarro J, Maldonado-Ocampo JA, Herrera-R  
686 GA, et al. Large-scale impacts of hydropower development on the  
687 Momp&#243;s Depression wetlands, Colombia [Internet]. *Water Resources*  
688 *Management/Modelling approaches*; 2017 Sep [cited 2020 May 15]. Available  
689 from: [https://www.hydrol-earth-syst-sci-discuss.net/hess-2017-544/hess-2017-](https://www.hydrol-earth-syst-sci-discuss.net/hess-2017-544/hess-2017-544.pdf)  
690 [544.pdf](https://www.hydrol-earth-syst-sci-discuss.net/hess-2017-544/hess-2017-544.pdf)
- 691 39. Hernández S, Pinilla M, Valderrama M. Presiones e impactos de los motores de  
692 transformación sobre el recurso pesquero. In: *Estado de las planicies inundables y*  
693 *el recurso pesquero en la macrocuenca Magdalena-Cauca y propuesta para su*  
694 *manejo integrado*. Primera Edición. Bogotá, Colombia; 2015. p. 419–58.
- 695 40. Castello L, Hess LL, Thapa R, McGrath DG, Arantes CC, Renó VF, et al. Fishery  
696 yields vary with land cover on the Amazon River floodplain. *Fish and Fisheries*  
697 [Internet]. 2018 May [cited 2018 May 22];19(3):431–40. Available from:  
698 <http://doi.wiley.com/10.1111/faf.12261>
- 699 41. IDEAM. Estudio Nacional del Agua 2014 [Internet]. Bogotá; 2015 [cited 2018 Jun  
700 20]. Available from:  
701 [http://documentacion.ideam.gov.co/openbiblio/bvirtual/023080/ENA\\_2014.pdf](http://documentacion.ideam.gov.co/openbiblio/bvirtual/023080/ENA_2014.pdf)
- 702 42. Couceiro SRM, Hamada N, Luz SLB, Forsberg BR, Pimentel TP. Deforestation  
703 and sewage effects on aquatic macroinvertebrates in urban streams in Manaus,  
704 Amazonas, Brazil. *Hydrobiologia* [Internet]. 2007 Jan [cited 2018 Mar  
705 15];575(1):271–84. Available from: [http://link.springer.com/10.1007/s10750-006-](http://link.springer.com/10.1007/s10750-006-0373-z)  
706 [0373-z](http://link.springer.com/10.1007/s10750-006-0373-z)
- 707 43. Fundación Omacha, Instituto de Investigación de Recursos Biológicos Alexander  
708 von Humboldt, Fondo Adaptación. Caracterización biológica y ecológica de las  
709 comunidades de plantas acuáticas, plantas terrestres y macroinvertebrados, y

- 710            caracterización físico-química de aguas de la ventana de estudio de la Ciénaga de  
711            Zapatosa [Internet]. Bogotá, Colombia: Instituto de Investigación de Recursos  
712            Biológicos Alexander von Humboldt; 2015 [cited 2020 Mar 24]. Report No.:  
713            Actividades: 4.1, 4.2 y 4.3. Available from:  
714            <http://repository.humboldt.org.co/handle/20.500.11761/9546>
- 715    44.    Valderrama M. La pesca en la cuenca Magdalena-Cauca: análisis integral de su  
716            estado y su problemática, y discusión de la estrategia de manejo. En ¿Para dónde  
717            va el Río Magdalena?: riesgos sociales, ambientales y económicos del proyecto de  
718            navegabilidad. Bogotá: Friedrich-Ebert-Stiftung : Foro Nacional Ambiental; 2015.  
719            243–251 p.
- 720    45.    Jiménez-Segura LF, Galvis-Vergara G, Cala-Cala P, García-Alzate CA, López-  
721            Casas S, Ríos-Pulgarín MI, et al. Freshwater fish faunas, habitats and conservation  
722            challenges in the Caribbean river basins of north-western South America:  
723            FRESHWATER FISHES OF NORTH-WEST SOUTH AMERICA. J Fish Biol  
724            [Internet]. 2016 Jul [cited 2020 May 15];89(1):65–101. Available from:  
725            <http://doi.wiley.com/10.1111/jfb.13018>
- 726    46.    Zhou S, Smith ADM, Punt AE, Richardson AJ, Gibbs M, Fulton EA, et al.  
727            Ecosystem-based fisheries management requires a change to the selective fishing  
728            philosophy. Proceedings of the National Academy of Sciences [Internet]. 2010  
729            May 25 [cited 2019 Oct 14];107(21):9485–9. Available from:  
730            <http://www.pnas.org/cgi/doi/10.1073/pnas.0912771107>
- 731    47.    Jiménez- Segura LF, López-Casas S, Morales-Betancourt M, González-Cañon G.  
732            *Triporthus magdalenae* (Steindachner 1878). In: I Catálogo de los recursos  
733            pesqueros continentales de Colombia [Internet]. 1st ed. Bogotá, D.C., Colombia:  
734            Instituto de Investigación de Recursos Biológicos Alexander von Humboldt; 2011  
735            [cited 2019 Aug 20]. p. 261–3. Available from:  
736            <http://reporte.humboldt.org.co/biodiversidad/2014/cap2/204.html>
- 737

bioRxiv preprint doi: <https://doi.org/10.1101/2020.06.04.134072>; this version posted June 5, 2020. The copyright holder for this preprint (which was not certified by peer review) is the author/funder, who has granted bioRxiv a license to display the preprint in perpetuity. It is made available under aCC-BY 4.0 International license.

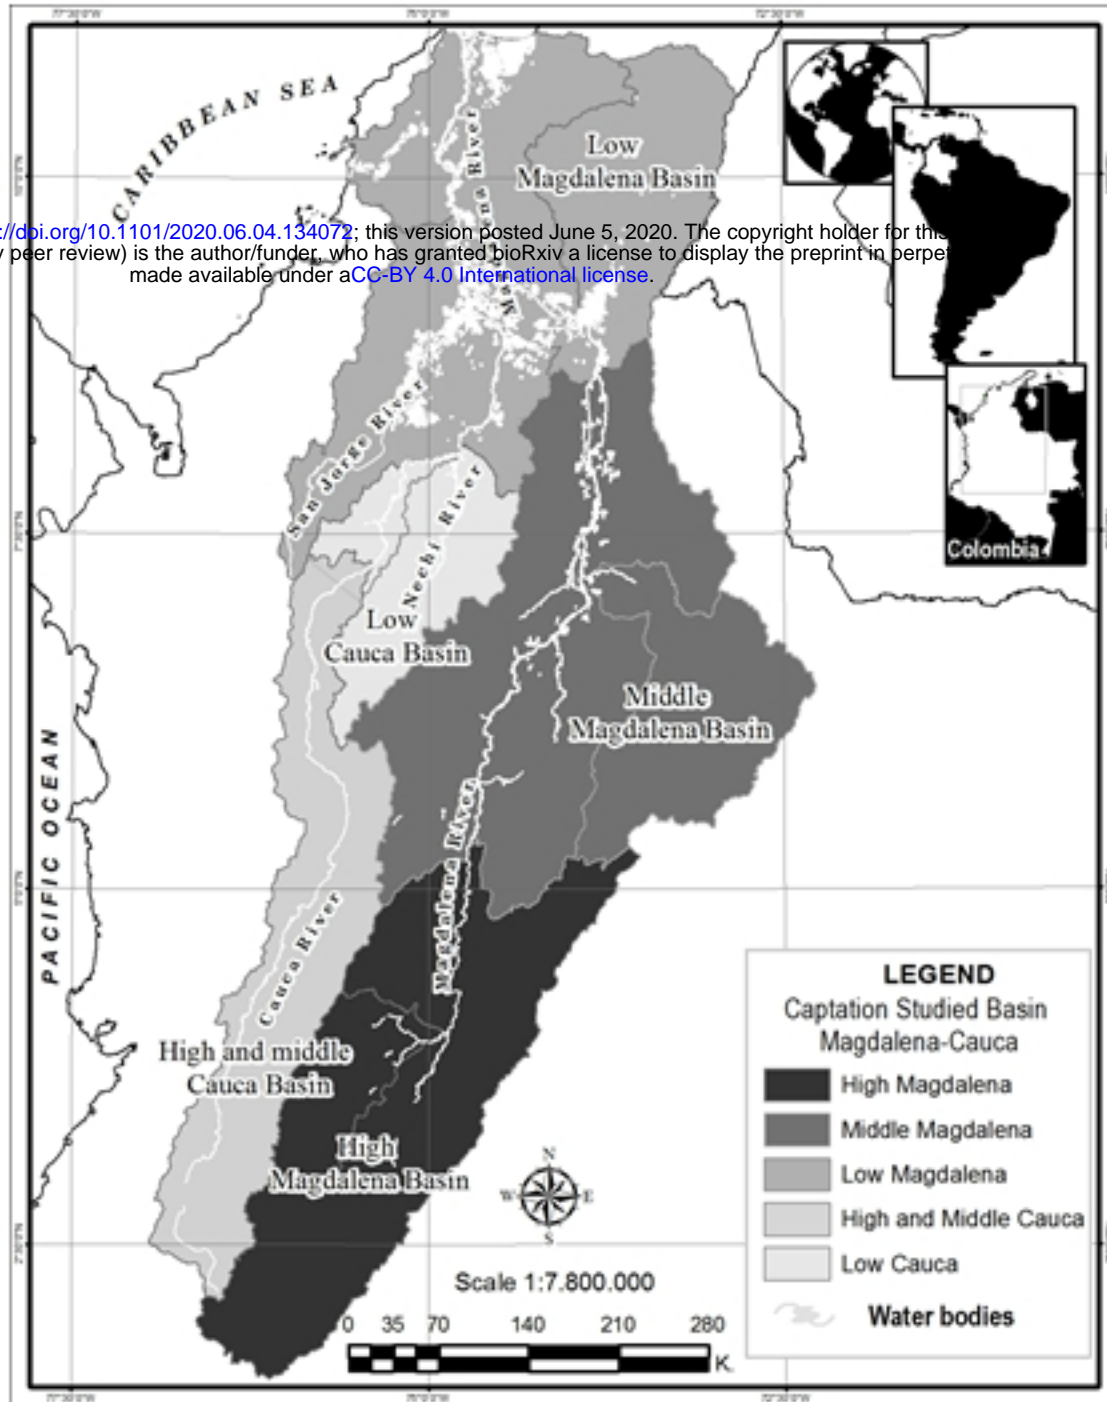

Figure

bioRxiv preprint doi: <https://doi.org/10.1101/2020.06.04.134072>; this version posted June 5, 2020. The copyright holder for this preprint (which was not certified by peer review) is the author/funder, who has granted bioRxiv a license to display the preprint in perpetuity. It is made available under aCC-BY 4.0 International license.

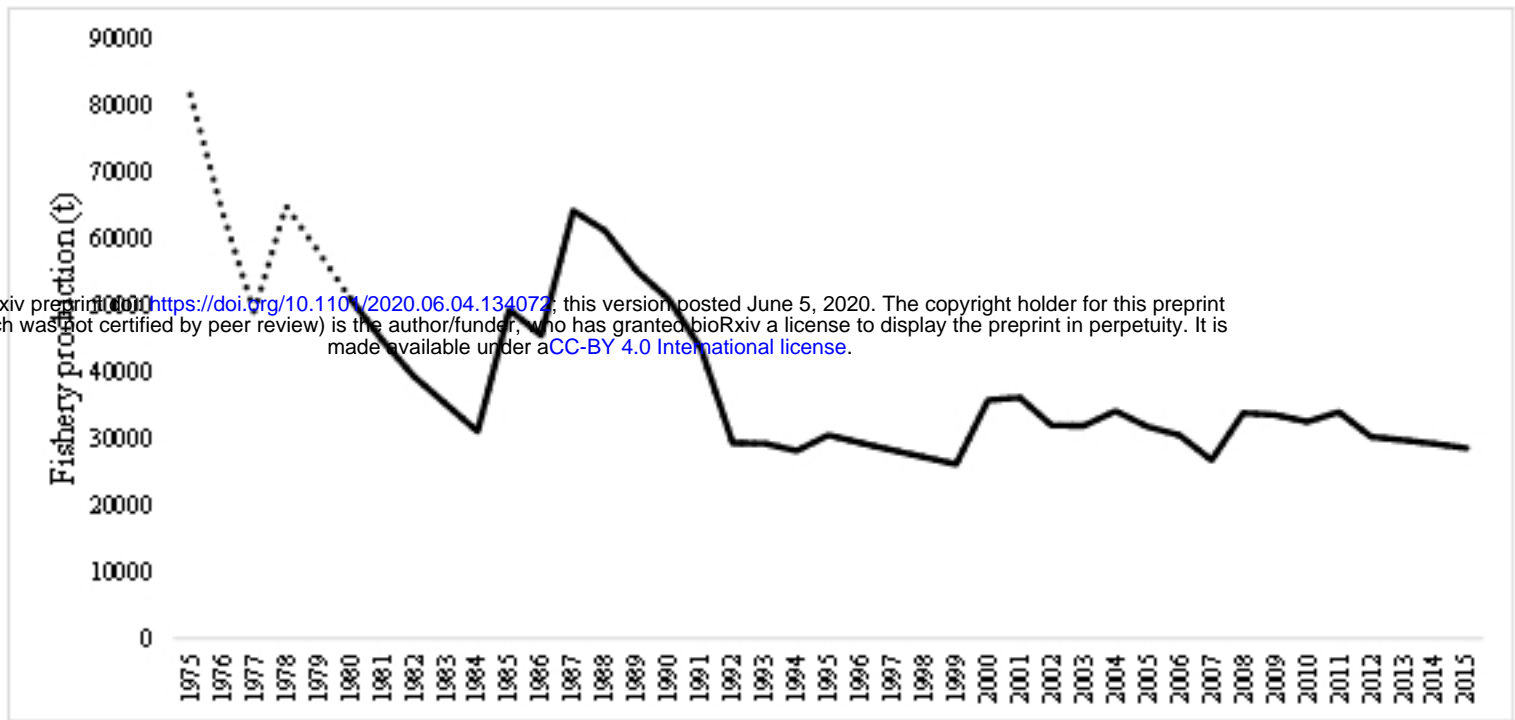

Figure

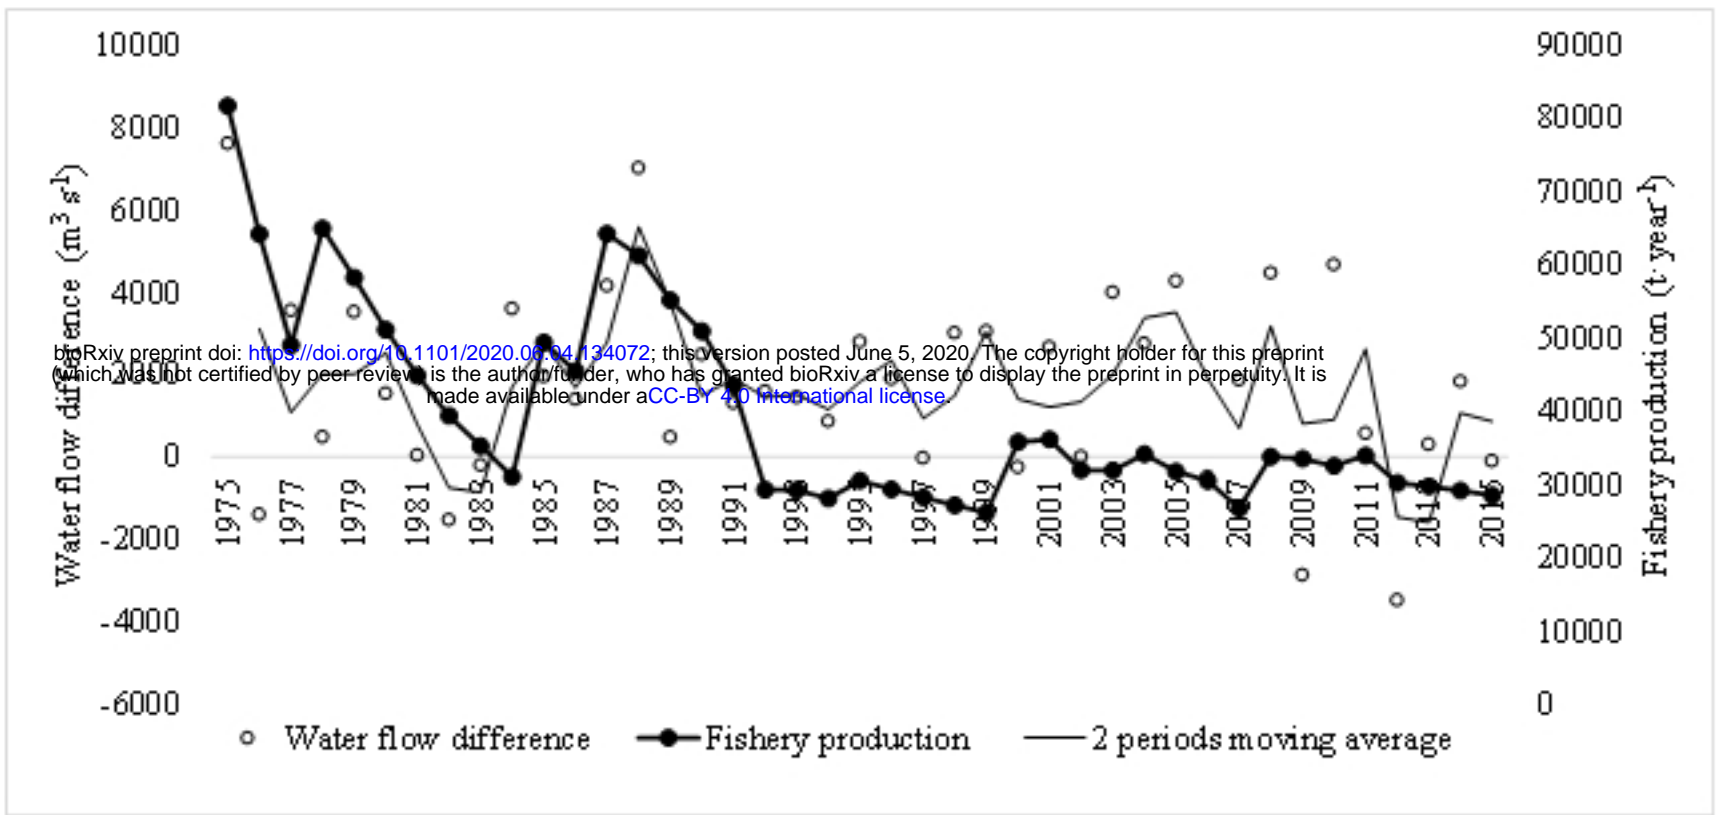

Figure

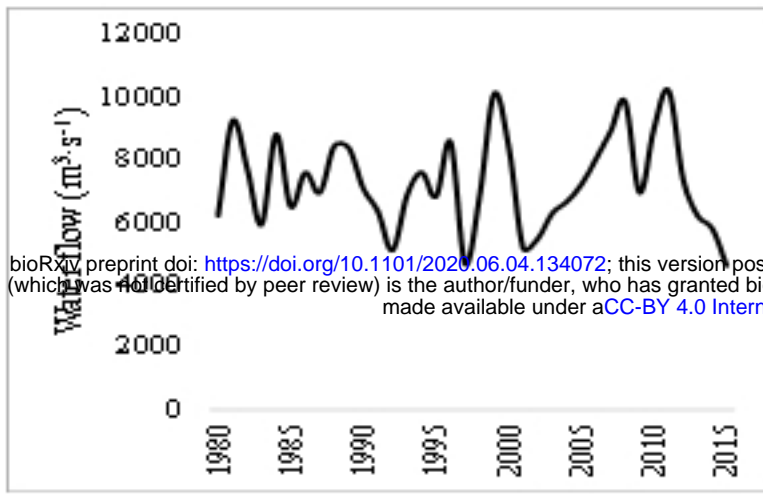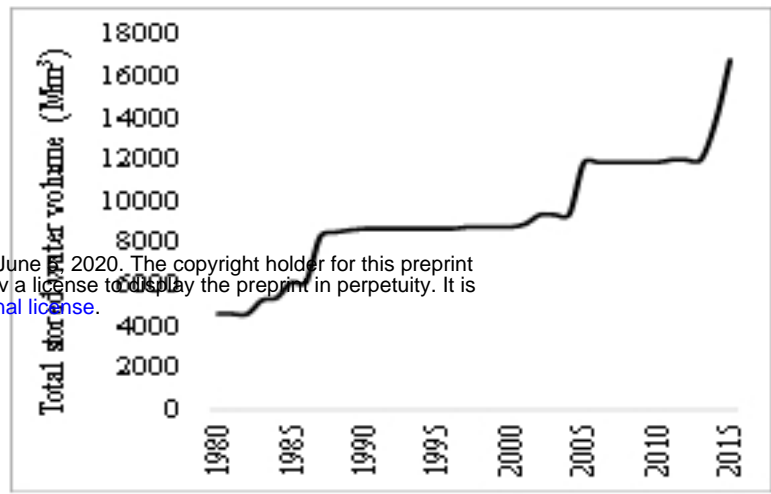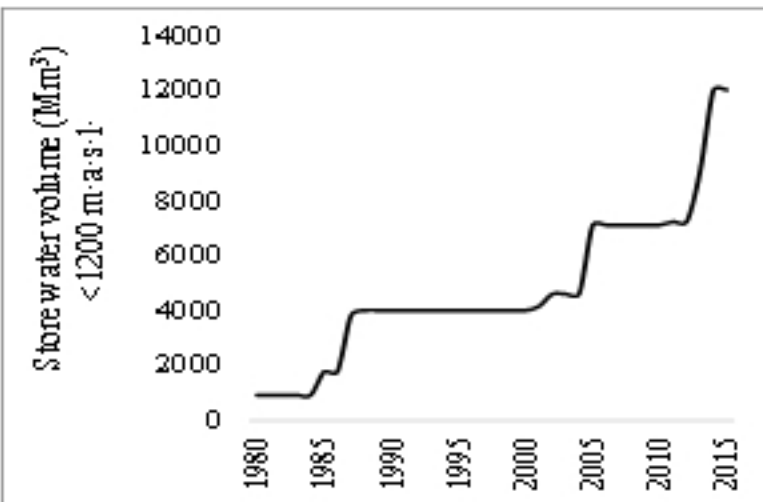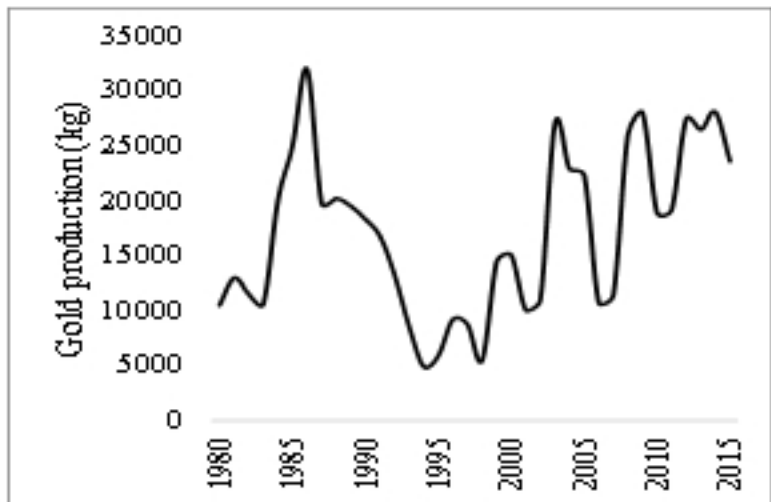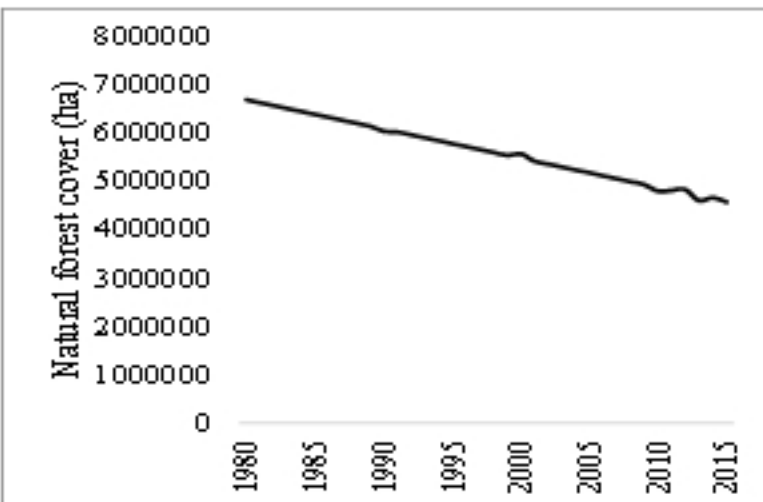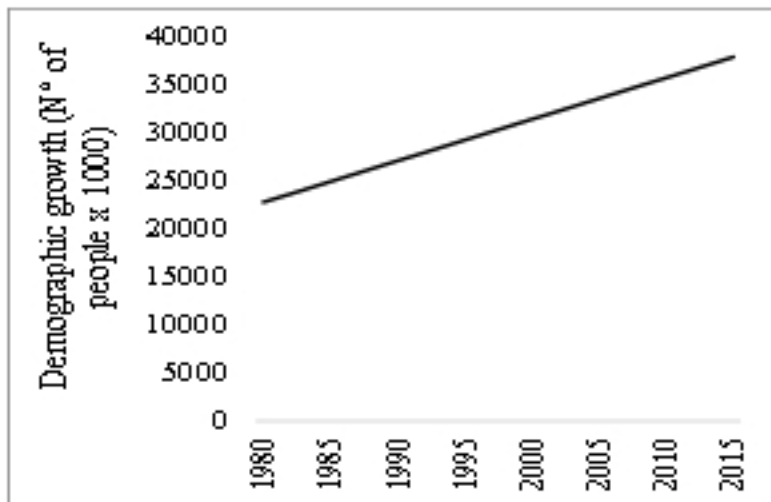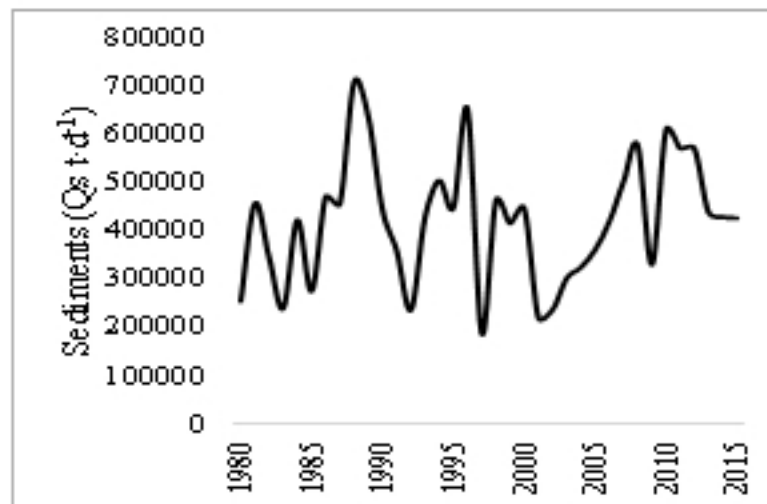

bioRxiv preprint doi: <https://doi.org/10.1101/2020.06.04.134072>; this version posted June 11, 2020. The copyright holder for this preprint (which was not certified by peer review) is the author/funder, who has granted bioRxiv a license to display the preprint in perpetuity. It is made available under aCC-BY 4.0 International license.



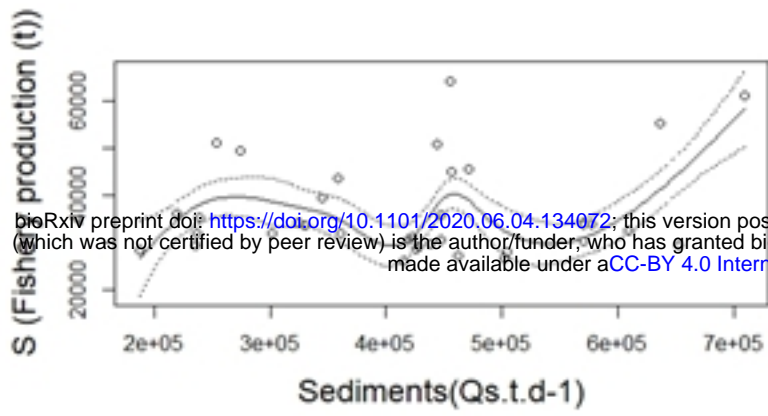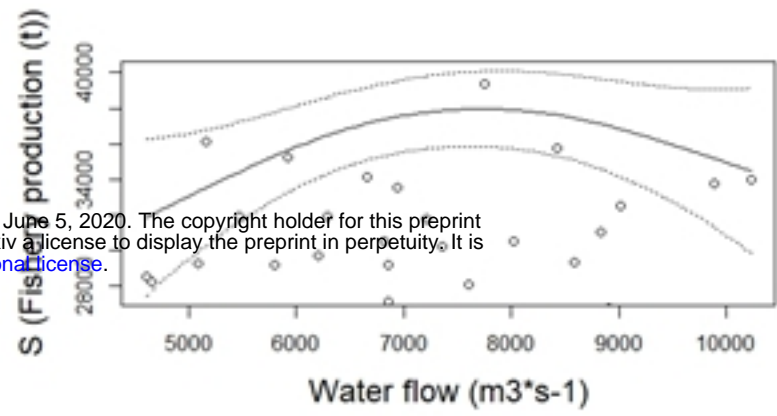

a

b

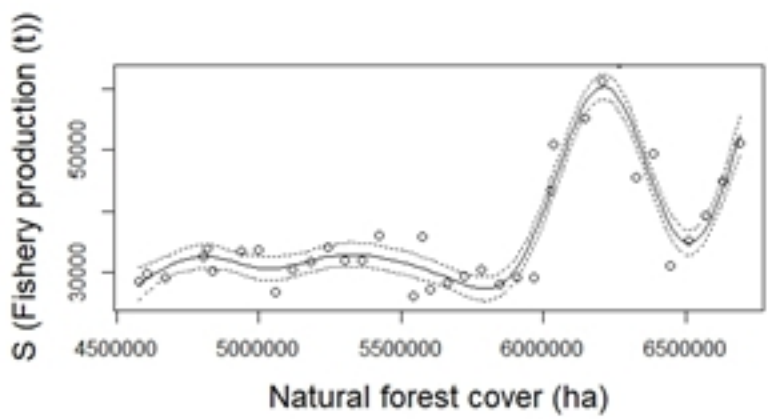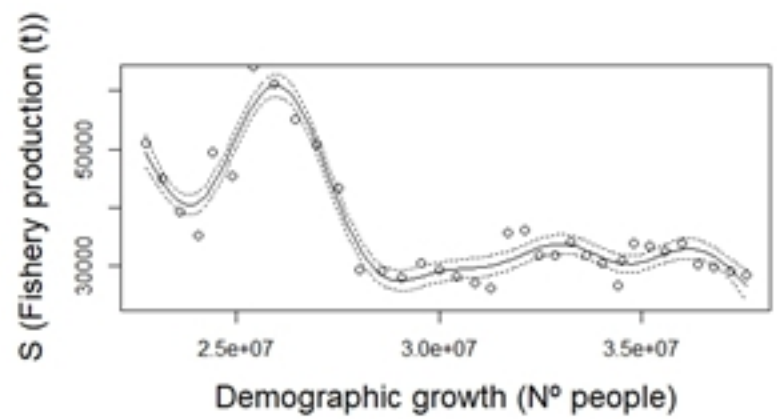

c

d

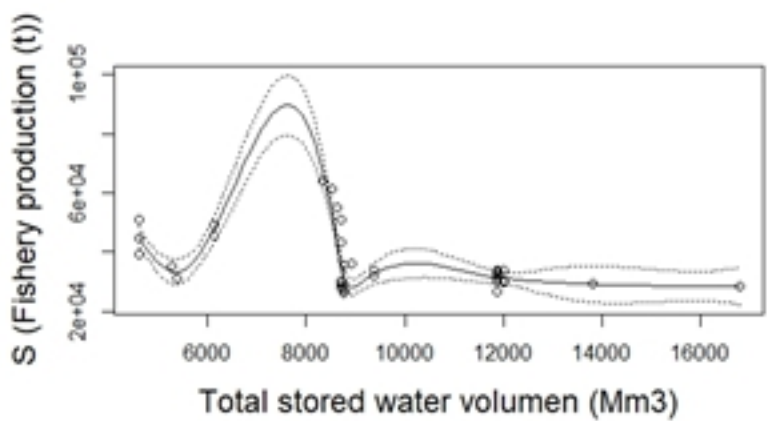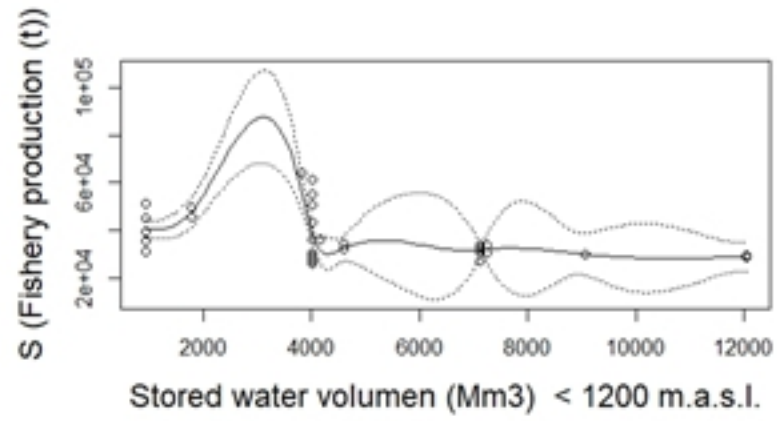

e

f

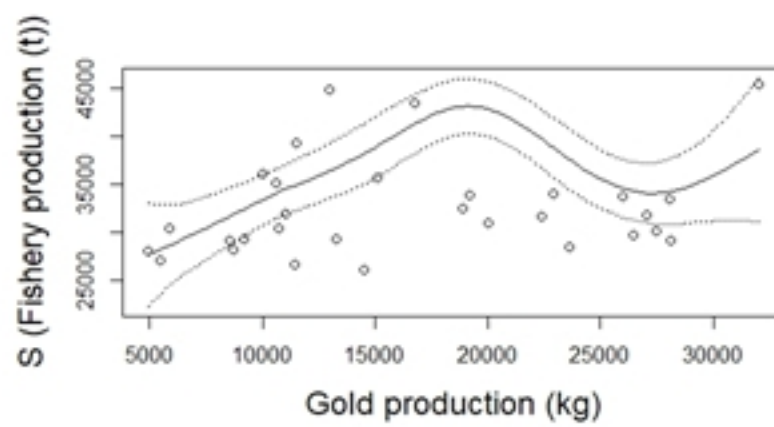

g
